# Supplementary material for: The role of oxygen vacancies in the sensing properties of Ni substituted SnO2 microspheres
Source: Royal Society of Chemistry journal article supplement (doi:10.1039/c8ra05679j), 2018-01-01
Supplement: c8ra05679j1.pdf [file c8ra05679j1.pdf]

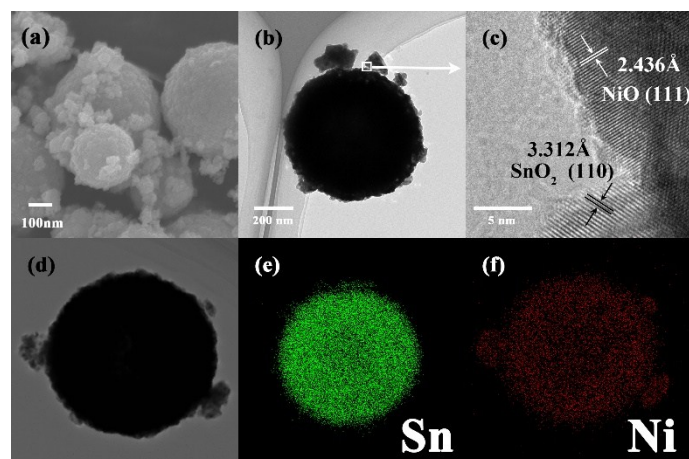

Fig.S1 (a) Typical FESEM image of S2; (b) typical TEM images of S2; (c) HRTEM image obtained from the marked fringe of (b); (d) TEM image and (e, f) the corresponding elemental mapping images of Sn and Ni.

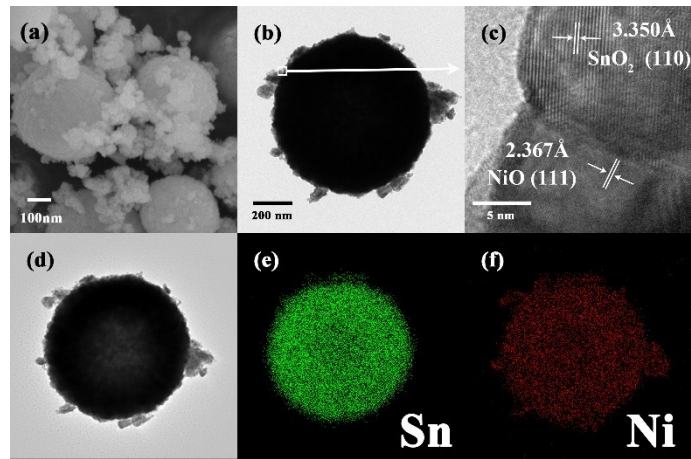

Fig.S2 (a) Typical FESEM image of S3; (b) typical TEM images of S3; (c) HRTEM image obtained from the marked fringe of (b); (d) TEM image and (e, f) the corresponding elemental mapping images of Sn and Ni.

# S1

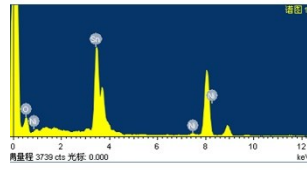

| Element | Weight Percentage (wt%) | Atom Percentage (at%) |
|---------|-------------------------|-----------------------|
| O K     | 7.12                    | 35.97                 |
| Ni K    | 1.09                    | 1.5                   |
| Sn L    | 91.79                   | 62.53                 |
| Total   | 100                     |                       |

# S2

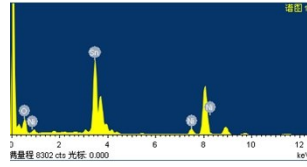

| Element | Weight Percentage (wt%) | Atom Percentage (at%) |
|---------|-------------------------|-----------------------|
| O K     | 6.53                    | 33.35                 |
| Ni K    | 3.27                    | 4.55                  |
| Sn L    | 90.2                    | 62.1                  |
| Total   | 100                     |                       |

# S3

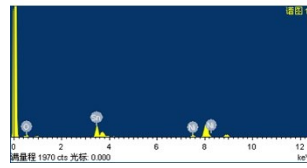

| Element | Weight Percentage (wt%) | Atom Percentage (at%) |
|---------|-------------------------|-----------------------|
| O K     | 7.12                    | 35.24                 |
| Ni K    | 4.1                     | 5.54                  |
| Sn L    | 88.78                   | 59.23                 |
| Total   | 100                     |                       |

Fig.S3 EDS element content of S1, S2 and S3.

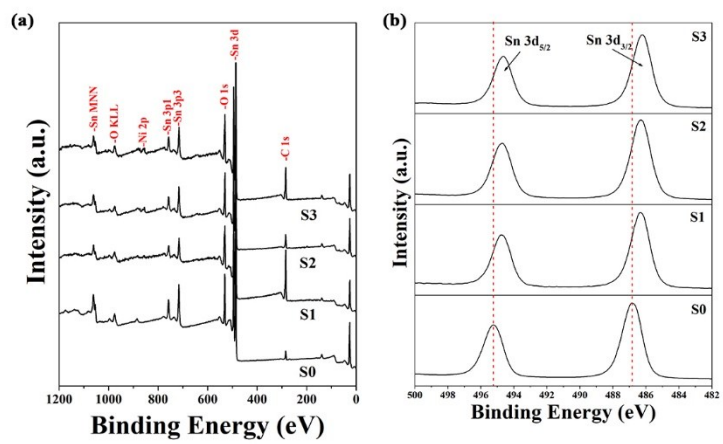

Fig.S4 XPS spectra of full spectra (a) and Sn 3d (b).

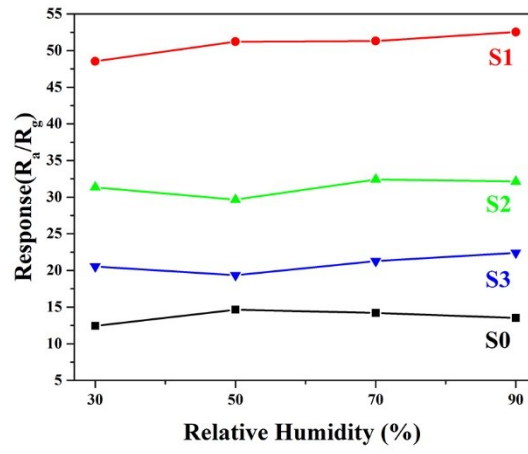

Fig.S5 Responses towards 100 ppm ethanol under different relative humidity.
